1 **Running title:** Biocontrol bacteria alleviate replanting problem

2

3 **Inoculation of biocontrol bacteria alleviated *Panax ginseng* replanting problem**

4

5 **Linlin Dong, Jiang Xu, Lianjuan Zhang, Guangfei Wei, He Su, Juan Yang, Jun**  
6 **Qian, Ran Xu, Baosheng Liao, Liang Shen, Mingli Wu, Ruiyang Cheng, Shilin**  
7 **Chen\***

8 **Key Laboratory of Beijing for Identification and Safety Evaluation of Chinese**  
9 **Medicine, Institute of Chinese Materia Medica, China Academy of Chinese**  
10 **Medical Sciences, Beijing 100700, China.**

11

12 **Highlight:** Changes in rhizospheric microbial communities driven by ginseng plants  
13 of different ages and developmental stages could cause microecological degradation.  
14 Biocontrol using microbial antagonists effectively alleviated the replanting problem.

15

16 **Linlin Dong E-mail: [lldong@icmm.ac.cn](mailto:lldong@icmm.ac.cn); Jiang Xu E-mail: [jxu@icmm.ac.cn](mailto:jxu@icmm.ac.cn);**

17 **Lianjuan Zhang E-mail: [zlj0970@163.com](mailto:zlj0970@163.com);**

18 **Guangfei Wei E-mail: [15098855936@163.com](mailto:15098855936@163.com); He Su E-mail: [suhe.gd@qq.com](mailto:suhe.gd@qq.com);**

19 **Juang Yang E-mail: [yangjuan6263@163.com](mailto:yangjuan6263@163.com);**

20 **Jun Qian E-mail: [qianjun@biozeron.com](mailto:qianjun@biozeron.com); Ran Xu E-mail: [53509011@qq.com](mailto:53509011@qq.com);**

21 **Baosheng Liao E-mail : [swjs082lbs@126.com](mailto:swjs082lbs@126.com);**

22 **Liang Shen E-mail: [lshen@icmm.ac.cn](mailto:lshen@icmm.ac.cn); Mingli Wu E-mail: [justuswu@163.com](mailto:justuswu@163.com);**

23 **Ruiyang Cheng E-mail: [18612545661@163.com](mailto:18612545661@163.com);**

24 **Shilin Chen\* \*To whom correspondence should be addressed**

25 **Tel: 0086-10-57203877; Fax: 0086-10- 62899776**

26 **E-mail: [slchen@icmm.ac.cn](mailto:slchen@icmm.ac.cn)**

27 **Linlin Dong and Jiang Xu have equal contributions to this work.**

28 **The date of submission: 5/29/2017**

29 **With 5121 words, 7 figures, and supplementary data (Figures 6 and Tables 5).**

30

31 **Abstract**

32 Replanting problem is a common and serious issue hindering the continuous  
33 cultivation of *Panax* plants. Changes in soil microbial community driven by plant  
34 species of different ages and developmental stages are speculated to cause this  
35 problem. Inoculation of microbial antagonists is proposed to alleviate replanting  
36 issues efficiently.

37 High-throughput sequencing revealed that bacterial diversity evidently decreased,  
38 and fungal diversity markedly increased in soils of adult ginseng plants in the root  
39 growth stage. Relatively few beneficial microbe agents, such as *Luteolibacter*,  
40 Cytophagaceae, *Luteibacter*, *Sphingomonas*, Sphingomonadaceae, and Zygomycota,  
41 were observed. On the contrary, the relative abundance of harmful microorganism  
42 agents, namely, Brevundimonas, Enterobacteriaceae, *Pandoraea*, Cantharellales,  
43 *Dendryphion*, *Fusarium*, and Chytridiomycota, increased with plant age. Furthermore,  
44 *Bacillus subtilis* 50-1 was isolated and served as microbial antagonists against  
45 pathogenic *Fusarium oxysporum* of ginseng root-rot, and its biocontrol efficacy was  
46 67.8% using a dual culture assay. The ginseng death rate and relative abundance of  
47 *Fusarium* decreased by 63.3% and 46.1%, respectively, after inoculation with 50-1  
48 in replanting soils. Data revealed that changes in the diversity and composition of  
49 rhizospheric microbial communities driven by ginseng of different ages and  
50 developmental stages could cause microecological degradation. Biocontrol using  
51 microbial antagonists was an effective method for alleviating the replanting problem.

52

53 **Keywords**

54 *Panax ginseng*; microbial communities; plant age; developmental stage; replanting  
55 problem; biocontrol.

56

## 57 **Introduction**

58 *Panax ginseng* C.A. Meyer demonstrates anti-inflammatory and antitumor effects,  
59 and it is commonly used in traditional Chinese medicine (Choo *et al.*, 2008; Ernst,  
60 2010). The current annual global market value of this species is approximately 3.5  
61 billion dollars (Hong *et al.*, 2006). Wild ginseng resources are becoming scarce  
62 because of excessive and predatory exploitation, and wild ginseng is gradually  
63 substituted with cultivated ginseng in mainstream market (Li *et al.*, 2012; Wu *et al.*,  
64 2013). Ginseng is continuously cultivated in fixed plots for 4–5 years, and  
65 subsequent replanting usually fails because of continuous cropping obstacles (Ying  
66 *et al.*, 2012a). Several years of crop rotation is needed in successful replanting.  
67 Large-scale deforestation increases to satisfy the market demand for ginseng.  
68 Moreover, conflict between the operation of ginseng industry and environmental  
69 conservation has worsened. Replanting issue is a severe drawback hindering the  
70 development of ginseng industry. Hence, this problem must be addressed urgently.

71 Factors such as deterioration of soil physicochemical properties,  
72 allelopathy/autotoxicity, outburst of soil-borne disease, and soil microbial  
73 community changes cause replanting problem (Ogweno & Yu, 2006; Wu *et al.*, 2008;  
74 Huang *et al.*, 2013). Changes in soil microbial community is one of the main factors  
75 hindering crop replantation (Nayyar *et al.*, 2009; Manici *et al.*, 2013). Xiao *et al.*  
76 (2016) reported that the lack of balance in rhizospheric microbial communities is one  
77 of the key factors causing discontinuous ginseng cultivation. Microbial communities  
78 exhibit evident changes during ginseng cultivation, thereby causing an imbalance in  
79 microbial community (Ying *et al.*, 2012b). Increase in the relative abundance of  
80 pathogenic microorganism could lead to the occurrence of soil-borne disease. Taken  
81 together, changes in rhizospheric microbial community are suggested to cause the  
82 replanting issues.

83 Many biotic or abiotic factors lead to changes in rhizospheric microbial  
84 communities. Plants of different ages can alter microbial community (Wu *et al.*,  
85 2015). Differences in diversity and composition of soil microbial community were  
86 observed under continuous cropping of *P. notoginseng*; moreover, fungal diversity

87 and microbial taxa in soil microbial community are related to seedling mortality  
88 (Dong *et al.*, 2016). Li *et al.* (2012) found that differences between rhizospheric and  
89 non-rhizospheric soil microbial community in a particular site tend to become  
90 increasingly significant with ginseng growth. *Panax* plants with different ages in a  
91 site drive changes in microbial community. Plant developmental stage influences  
92 microbial community structure and activity, and marked shifts in diversity and  
93 relative activity are observed in soil microbial communities of different  
94 developmental stages (Houlden *et al.*, 2008). However, the information whether  
95 *Panax* plants of different ages and developmental stages mediate microbial  
96 community is unclear. We hypothesized that changes in the rhizospheric microbial  
97 community driven by ginseng plants of different ages and developmental stages  
98 could cause microecological degradation.

99 Root rot is a severe disease that hinders the replantation of *Panax* plants (Guo *et*  
100 *al.*, 2009). This soil-borne disease is caused by the pathogenic fungus *Fusarium*  
101 *oxysporum*, which is the main agent in *Panax* plants (Miao *et al.*, 2006; Dong *et al.*,  
102 2016). The relative abundance of *F. oxysporum* increased with the notoginseng  
103 cultivation and death rate of seedlings was significantly related to its abundance  
104 (Dong *et al.*, 2016). Thus decrease in the abundance of pathogenic *F. oxysporum*  
105 could alleviate the occurrence of root-rot. Biological control using microbial  
106 antagonists has attracted interest as an effective method to control plant pathogens  
107 due to its non-toxic nature (Zheng *et al.*, 2011). Many studies reported that  
108 biocontrol bacteria, such as *Pseudomonas fluorescens* and *Bacillus*  
109 *amyloliquefaciens* RWL-1, show evident growth inhibition activity against *F.*  
110 *oxysporum* in tomato (Kamilova *et al.*, 2006; Shahzad *et al.*, 2017). Nevertheless,  
111 microbial antagonists against ginseng root rot is scarce, and application of biocontrol  
112 bacteria could be effective to alleviate the replanting problem.

113 Recently, herbgenomics has been raised for medicinal plants research using  
114 genomic tools including investigating rhizospheric environment using metagenomic  
115 sequencing (Chen *et al.*, 2015). In the present study, high-throughput sequencing  
116 analysis of 16S and 18S rRNA genes was used to demonstrate changes in the

117 diversity and composition of soil microbial communities in the rhizosphere of  
118 ginseng seedlings of different ages and developmental stages. Furthermore,  
119 biocontrol bacteria against *F. oxysporum* were isolated using a dual culture technique,  
120 and their inhibition activity in a replanting soil was confirmed. These results  
121 increased our understanding of the reasons behind replanting issues caused by  
122 rhizospheric microbial community. Data provided an effective method for soil  
123 bioremediation to alleviate issues in replanting of Chinese herbal medicine.

124

## 125 **Materials and Methods**

### 126 **Field experiment and soil extraction**

127 This field experiment was performed in a ginseng plantation in Jingyu, Jilin  
128 Province (42°20'N, 126°50'E, 775 m a.s.l.), which is the main ginseng-producing  
129 region in China. This region receives a northern temperate continental climate and an  
130 annual precipitation of approximately 767 mm. The plough layer in the plantation  
131 consists of gray brown soil.

132 Ginseng seedlings are consecutively grown for 4–5 years in a fixed site before  
133 their root can be harvested. The disease and mortality of ginseng seedlings generally  
134 occur after being consecutively grown for 2 years. Thus, we analyzed the influence  
135 of two-, three-, and four-year-old transplanted seedlings on rhizospheric microbial  
136 communities. In this experiment, two-, three-, and four-year-old ginseng seedlings  
137 were transplanted in each plot in our plantation and denoted as 2-y, 3-y, and 4-y,  
138 respectively. In our plantation, field plots were arranged in a completely randomized  
139 block design, and three replicate plots (1.7 m × 8.0 m) were used for each plant age.  
140 Ginseng was cultivated strictly in accordance with the standard operating procedures  
141 of good agricultural practice (Heuberger *et al.*, 2010; Zhang *et al.*, 2010).

142 The distinct stages of ginseng development are as follows: vegetative,  
143 flowering, fruiting, root growth, and annual dormancy (Table S1). During dormancy,  
144 the aboveground plant parts of ginseng wither, and the root becomes dormant. In this  
145 stage, the underground root activities weaken, and soil samples obtained during this  
146 stage are not included in analyses. This experiment included 36 soil samples

147 obtained from two-, three-, and four-year-old ginseng seedlings under four  
148 developmental stages, namely, vegetative (2-Ve, 3-Ve, and 4-Ve), flowering (2-Fl,  
149 3-Fl, and 4-Fl), fruiting (2-Fr, 3-Fr, and 4-Fr), and root growth (2-Ro, 3-Ro, and  
150 4-Ro). Six ginseng seedlings were randomly obtained from each plot (1.7 m × 8.0 m);  
151 the soils were removed, and rhizosphere fractions were brushed and pooled into one  
152 sample. Soil samples were obtained from three replicates per treatment. Thirty-six  
153 soil samples were homogenized by passing through a 2 mm sieve for further  
154 processing. The characteristics of the soil samples are described in Table S2.

155

### 156 **Calculation of emergence and survival rates**

157 The ginseng emergence rate was analyzed in May. The emergence rate in each plot  
158 was calculated as follows: number of emerging ginseng seedlings divided by the  
159 total number of transplanted seedlings. The mortality of ginseng seedlings was  
160 observed from June to August, and the survival rate was determined at the end of  
161 August. The survival rate of ginseng in each plot was calculated as follows: number  
162 of living seedlings divided by the total number of emerging seedlings in the area.  
163 Three plots per treatment served as three replicates.

164

### 165 **DNA extraction and PCR amplification**

166 Total soil DNA was extracted from 0.1 g of freeze-dried soil using a MoBio  
167 Powersoil Kit (MoBio Laboratories Inc., Carlsbad, CA) according to the  
168 manufacturer's instructions; the DNA was stored at -20 °C for further processing.  
169 For each sample, fragments of 16S and 18S rRNA genes were amplified using the  
170 conserved primers 27F/338R (Fierer *et al.*, 2008) and 817F/1196R (Rousk *et al.*,  
171 2010). The forward and reverse primers contained an eight-base pair barcode (Table  
172 S3). Amplification reactions and purification were performed as previously  
173 described (Rodrigues *et al.*, 2013). Purified PCR products were quantified by  
174 Qubit®3.0 (Life Invitrogen, Germany), and these amplicons were pooled in  
175 equimolar ratios for sequencing.

176

177 **High-throughput sequencing**

178 The pooled DNA product was used to construct Illumina pair-end library according  
179 to the Illumina's genomic DNA library preparation procedure. The amplicon library  
180 was subsequently paired-end sequenced ( $2 \times 250$ ) on an Illumina HiSeq platform  
181 (Shanghai Biozeron Co., Ltd.) according to standard protocols.

182 Raw FASTQ files were demultiplexed and quality-filtered using QIIME with  
183 the following pipeline (Caporaso *et al.*, 2010). Operational taxonomic units were  
184 clustered using 97% similarity cutoff by using UPARSE (version 7.1  
185 <http://drive5.com/uparse/>), and chimeric sequences were identified and removed  
186 using UCHIME. The phylogenetic affiliation of each 16S and 18S rRNA gene  
187 sequence was analyzed using Ribosomal Database Project (Wang *et al.*, 2007) and  
188 Silva schemes (Quast *et al.*, 2013). Rarefaction analysis based on Mothur v.1.21.1  
189 (Schloss *et al.*, 2009) was performed to reveal diversity indexes, including Chao 1  
190 and Shannon diversity ( $H'$ ) indexes. We clustered the taxa obtained from the RDP  
191 Classifier through complete linkage hierarchical clustering by using R package  
192 HCLUST (<http://sekhon.berkeley.edu/stats/html/hclust.html>). PCoA was used to  
193 compare groups of samples based on unweighted UniFrac distance metrics in QIIME  
194 (Caporaso *et al.*, 2010). Linear discriminant analysis effect size (LEfSe)  
195 (<http://huttenhower.sph.harvard.edu/lefse/>) was used to characterize the features  
196 differentiating the bacterial and fungal communities in soils according to the  
197 methods described by Segata *et al.* (2011). All metagenomic data were submitted to  
198 the National Center for Biotechnology Information (<http://www.ncbi.nlm.nih.gov>);  
199 the accession numbers of 16S rRNA and 18S rRNA genes are SRP103168 and  
200 SRP103176, respectively.

201

202 **Quantitative PCR of *Fusarium***

203 To compare the relative abundance of *Fusarium* in soils of ginseng seedlings, the  
204 copy numbers of *Fusarium* were calculated using the ITS-Fu-F/ITS-Fu-R  
205 (Abd-Elsalam *et al.*, 2003). Quantitative PCR was performed according to the  
206 description of Rousk *et al.* (2010) with minor modification. Standard curves were

207 generated using 10-fold serial dilution of a plasmid containing a full-length copy of  
208 *F. oxysporum* 18S rRNA gene to estimate the copy numbers of *Fusarium*. qPCR  
209 reactions (25 µL) were performed using a SYBR Green PCR Master mix (Takara,  
210 Toyobo, Japan). *Fusarium* copy numbers were generated using a regression equation  
211 for each assay relating the cycle threshold value to the known number of copies in  
212 the standards.

213

#### 214 **Isolation and selection of antagonistic bacteria**

215 Biological control is one of the most remarkable potential approaches for plant  
216 disease control. Due to the increase in the abundance of pathogenic agents of  
217 ginseng root rot,

218 a dual culture assay was used to screen microbial antagonists against *F. oxysporum*.

219 Rhizosphere soils of three-year ginseng seedlings under root growth stage were used  
220 to isolate and select the antagonistic bacteria against *F. oxysporum*. The pathogenic *F.*  
221 *oxysporum* was isolated and confirmed in our previous study (Wang *et al.*, 2016).

222 Soil (10 g) was homogenized in 100 mL of sterile distilled water, and the bacteria  
223 were isolated through serial dilution technique. The isolated single strain was  
224 screened on the basis of its antagonistic activity against *F. oxysporum* in a dual  
225 culture according to the description of Shahzad *et al.* (2017). The experiment was  
226 replicated three times. The zone of inhibition was measured following the  
227 description of Kaiser *et al.* (2005) to screen the antagonistic bacterium and examine  
228 the antagonistic activity of the candidates.

229

#### 230 **Identification of antagonistic bacterial strain**

231 Antagonistic bacterium (named strain 50-1) was identified by morphological and  
232 molecular methods. The morphology of strain 50-1 was recorded after it was  
233 incubated on Luria–Bertani (yeast extract (5 g), peptone (10 g), NaCl (10 g), and  
234 agar (10 g) in 1 L of water) medium for 24 h later. Strain 50-1 was molecularly  
235 identified by amplifying 16S rRNA according to the description by Cai *et al.* (2012).  
236 The amplified PCR product was analyzed on a 3730 XL sequencer (Applied



237 Biosystems, Foster City, CA, USA), and the generated sequence (accession number  
238 KY962803) was submitted to GenBank. Neighbor-joining trees were constructed in  
239 MEGA v6.0 to generate Kimura 2-parameter distance matrixes for each sequence  
240 following standard parameters. The numbers at the branch knots were bootstrap  
241 values based on 1000 resamplings for the maximum likelihood.

242 To further identify the strain 50-1, total genomic DNA from strain 50-1 was  
243 extracted (Tiangen, Beijing, China) and purified by RNase-free DNase I (Takara,  
244 Kyoto, Japan) to analyze its genome. The complete genome sequence was assembled  
245 using a hybrid sequencing strategy combining PacBio RS II and Illumina HiSeq  
246 sequencing platforms (Koren *et al.*, 2012). Genome sequencing was performed with  
247 Illumina HiSeq2500 using the PE250 strategy following the manufacturer's protocol.  
248 The reads obtained with Illumina PCR adapter and the filtered low-quality reads  
249 were assembled by SOAPdenovo (Li *et al.*, 2008; Li *et al.*, 2010) to generate  
250 scaffolds. Gene prediction genome assembly was performed using Glimmer and  
251 gene functions were annotated by BLASTP against NR, COG and KEGG databases.  
252 GeneMarkS (Besemer *et al.*, 2001) with an integrated model combining the  
253 GeneMarkS-generated parameters and Heuristic model parameters. A genome  
254 overview with annotation information was created using Circos (Krzywinski *et al.*,  
255 2009). The whole genome was deposited in NCBI (BioProject ID PRJNA383782).

256

### 257 **Evaluation of the biocontrol efficacy of antagonists in replanting soils**

258 A pot experiment was performed to assess the biocontrol efficacy of bacterium 50-1  
259 in replanting soils in our phytotron. Each pot contained 1 kg of soils cultivated with  
260 ginseng seedlings for three years and happened root rot. Two-year-old ginseng  
261 seedlings (three plants) were transplanted in each pot. The pots were placed in the  
262 phytotron under the following conditions:  $26\pm 2$  °C, 60% humidity, and 14 h of light  
263 alternating with 10 h of darkness. The rhizospheres of uniform ginseng seedlings  
264 were inoculated with 1 mL ( $10^6$  cfu mL<sup>-1</sup>) of cultures containing biocontrol strains  
265 when the seedlings were cultivated for one week. Pots were inoculated with cultures  
266 containing inactivated strains as controls. Five pots served as one replicate, and three

267 replicates were prepared. After a two months following inoculation, the death rate of  
268 ginseng seedlings was calculated as follows: number of dead seedlings divided by  
269 the total number of transplanted seedlings in each treatment. The rhizosphere soils of  
270 three seedlings were randomly selected from each treatment, and they served as one  
271 sample for the analysis of the relative abundance of *Fusarium*. The experiment was  
272 replicated three times.

273

#### 274 **Statistical analyses**

275 SPSS version 16.0 software (SPSS Inc., Chicago, IL, USA) was used for statistical  
276 analyses. Variables were considered for all treatment replicates and subjected to  
277 ANOVA. Mean values were compared by calculating the least significant difference  
278 at 5% level.

279

#### 280 **Results**

##### 281 **Emergence and survival rates of ginseng seedlings**

282 The ginseng plants grown on field showed a healthy appearance with no sign of  
283 disease during the growing season (Figs. 1A–1C). The emergence and survival rates  
284 exhibited no significant difference among two-, three-, or four-year-old ginseng  
285 seedlings (Figs. 1D, 1E). The emergence rate of two-, three-, or four-year-old  
286 ginseng seedlings ranged from 82.3% to 86.9% (Fig. 1D), and their survival rate was  
287 94.1%–97.1% (Fig. 1E). The growth of ginseng seedlings of different ages was  
288 favorable, which guaranteed the success of the field experiment.

289

##### 290 **Taxonomic diversity of bacterial and fungal communities**

291 A total of 2,296,684 classifiable 16S rRNA sequence reads were obtained from 36  
292 soil samples for analysis (Table S3). The mean number of classifiable sequences per  
293 sample was 63,796 (dominant length: 283–293 bp). The bacterial diversity indexes  
294 ( $H'$  and Chao 1) markedly changed in the rhizosphere of ginseng seedlings of  
295 different ages in late developmental stages (Fig. 2).  $H'$  and Chao 1 values were  
296 significantly higher in the rhizosphere of 4-y seedlings than those in the rhizosphere

297 of 2-y seedlings in fruiting stage (Figs. 2A, 2B). During root growth,  $H'$  and Chao 1  
298 values evidently decreased in the rhizospheres of 3-y and 4-y seedlings than those in  
299 the rhizosphere of 2-y seedlings.

300 A total of 1,321,521 classifiable fungi sequences with a mean of 36,709  
301 sequences were obtained per soil sample (dominant length: 411–414 bp; Table S3).  
302  $H'$  and Chao 1 values markedly decreased in the rhizosphere with increasing ginseng  
303 age under vegetative stage (Figs. 2C, 2D). During root growth,  $H'$  and Chao 1 values  
304 were evidently higher in the soils of 3-y and 4-y seedlings than those in the soil of  
305 2-y seedlings.

306

### 307 **Variation in bacterial and fungal community compositions**

308 PCoA ordination and Bray–Curtis distance matrix revealed evident difference in  
309 bacterial communities in soils of ginseng plant of different ages and developmental  
310 stages (Figs. 3, S1). In vegetative and flowering stages, the second principal  
311 components (14.41% and 14.22% contributions, respectively) demonstrated that the  
312 bacterial communities in soils of 2-y seedlings differed from those in soils of 4-y  
313 seedlings (Figs. 3A, 3B). In fruiting stage, the first principal component axis (22.00%  
314 contributions) indicated that the bacterial communities in soils of 2-y seedlings  
315 significantly differed from those in soils of 3-y seedlings (Fig. 3C). Additionally, the  
316 first principal component axis (22.29% contributions) indicated that the bacterial  
317 communities in soils of 3-year-old seedlings significantly differed from those in soils  
318 of 2-y and 4-y seedlings; furthermore, the second principal component (13.98%  
319 contributions) demonstrated that the bacterial communities in soils of 2-y seedlings  
320 differ from those in soils of 4-y seedlings (Fig. 3D). LEfSe revealed differences in  
321 the rhizospheric bacterial communities of ginseng seedlings of different ages and  
322 developmental stages (Fig. S2).

323 PCoA ordination and Bray–Curtis distance matrix revealed that fungal  
324 communities obviously differed in the soils of ginseng seedlings of different ages  
325 and developmental stages (Figs. 3, S1). In vegetative stage, the first principal  
326 component axis (33.94% contribution) of the fungal communities in soils of 4-y

327 seedlings markedly differed from those of the fungal communities in soils of 2-y  
328 seedlings. Moreover, the second principal component axis (17.55% contribution) of  
329 the fungal communities in soils of 2-year-old seedlings considerably differed from  
330 those of the fungal communities in the soils of 3-y seedlings (Fig.3E). At the  
331 flowering and fruiting stages, the first principal components (25.71% and 38.96%  
332 contributions, respectively) in the fungal communities in soils of 2-y ginseng  
333 seedlings significantly differed from those of the fungal communities in the soils of  
334 3-y and 4-y seedlings (Figs. 3F, 3G). During root growth, the first principal  
335 component (26.97% contribution) of fungal communities in soils of 3-y seedlings  
336 considerably differed from those of fungal communities in soils of 2-y and 4-y  
337 seedlings, and the second principal component (14.93% contribution) in fungal  
338 communities in soils of 2-y seedlings differed from those of fungal communities in  
339 soils of 4-y seedlings (Fig. 3H). According to LEfSe analysis, fungal composition  
340 differed in the soils of ginseng seedlings of different ages and developmental stages  
341 (Fig. S3).

342

#### 343 **Changes in the relative abundance of bacterial taxa**

344 The relative abundance of bacterial groups changed in soils of ginseng plants of  
345 different ages and developmental stages (Fig. 4). The relative abundance of  
346 Chthoniobacteraceae, Chthonomonadales, Chthonomonadetes, *Chthoniobacter*,  
347 *Granulicella*, and *Blastocatella* declined with plant age in vegetative stage (Fig. 4A).  
348 The relative abundance of *Arthrobacter*, *Brevundimonas*, Micrococcaceae,  
349 Rhodobiaceae, Intrasporangiaceae, and Micrococcales was significantly higher in  
350 soils of 3-y and 4-y seedlings than that in soils of 2-y seedlings. The relative  
351 abundance of *Luteolibacter*, Phyllobacteriaceae, *Acidovorax*, *Moheibacter*, and  
352 Cytophagaceae in soils of 3-y and 4-y seedlings evidently decreased, and the  
353 abundance of Elusimicrobia and Armatimonadetes was markedly increased in the  
354 flowering stage (Fig. 4B). The relative abundance of *Bacillus*, Enterobacteriales,  
355 Enterobacteriaceae, *Brevundimonas*, and Anaerolineae was significantly higher in  
356 soils of 3-y and 4-y seedlings than that in soils of 2-y seedlings; additionally, the

357 abundance of *Luteibacter*, Clostridia, and Clostridiales declined in soils of 3-y and  
358 4-y seedlings in fruiting stage (Fig. 4C). The relative abundance of *Paralcaligenes*,  
359 Sphingomonadaceae, Saccharibacteria, *Sphingomonas*, and Alcaligenaceae  
360 significantly decreased with plant age, whereas the relative abundance of *Pandoraea*,  
361 Chlamydiales, and Chlamydiae was obviously higher in soils of 3-y and 4-y  
362 seedlings than that in soils of 2-y seedlings in root growth stage (Fig. 4D).

363

### 364 **Changes in the relative abundance of fungal taxa**

365 The relative abundance of fungal taxa changed in soils of ginseng plants of different  
366 ages and developmental stages (Fig. 5). The relative abundance of  
367 Cystofilobasidiales, Ophiostomataceae, *Ophiostoma*, Ophiostomatales, and  
368 Cystofilobasidiaceae significantly declined with seedling age, and the abundance of  
369 Pezizales, Cantharellales, *Dendryphion*, Pezizomycetes, and Tubeufiaceae was  
370 evidently higher in soils of 4-y seedlings than those in soils of 2-y and 3-y seedlings  
371 in the vegetative stage (Fig. 5A). The relative abundance of Microascales, *Helicoma*,  
372 and Tubeufiaceae was obviously higher in soils of 4-y seedling than those in soils of  
373 2-y and 3-y seedlings in the flowering stage (Fig. 5B). The relative abundance of  
374 Tremellales, Acrospermales, *Occultifur*, *Acrospermum*, Cystobasidiales,  
375 Cystobasidiaceae, and Cystobasidiomycetes was markedly higher in the soils of 4-y  
376 seedlings than that in the soils of 2-y and 3-y seedlings in fruiting stage (Fig. 5C).  
377 The relative abundance of Zygomycota was obviously lower in soils of 3-y and 4-y  
378 seedlings than that in soils of 2-y seedlings, and the abundance of Tremellomycetes,  
379 Chytridiomycota, and Sordariales significantly increased in soils of 4-y seedlings  
380 than those in soils of 2-y and 3-y seedlings in root growth stage (Fig. 5D).

381 The relative abundance of *Fusarium* showed increasing trends in the soils of the  
382 adult ginseng plants under later developmental stages (Figs. 5E, S4). According to  
383 the high-throughput sequencing analysis, the relative abundance of *Fusarium*  
384 increased by 22.5%–25.0%, 35.7%–50.0%, and 18.2%–36.4% in soils of 3-y and 4-y  
385 seedlings in the flowering, fruiting, and root growth stages, respectively (Fig. 5E).  
386 The copy numbers of *Fusarium* also showed similar trends based on the analysis of

387 quantitative PCR (Fig. S4). These results revealed that the relative abundance of  
388 pathogenic agent increased in soils during ginseng growth.

389

### 390 ***Bacillus subtilis* 50-1 were responsible for the biocontrol of *F. oxysporum***

391 Due to the relative abundance of pathogenic agent (*Fusarium*) increase in the  
392 ginseng soils, dual culture techniques were used to isolate microbial antagonists  
393 against *F. oxysporum* to control root rot. Antagonistic bacterium, namely, *B. subtilis*  
394 50-1, was isolated and confirmed using a dual culture technique (Fig. 6). Strain 50-1  
395 exhibited a broad spectrum of growth inhibition activity against *F. oxysporum*,  
396 thereby resulting in 67.8% inhibition percentage (Fig.6A). Strain 50-1 is a  
397 Gram-positive, oxidase- and catalase-positive, rod-shaped bacterial species (Fig.6B,  
398 Table S4). Analysis of the 16S rRNA sequences revealed that strain 50-1 belonged to  
399 *B. subtilis* with the bootstrap value of 100% (Fig. 6C). Strain 50-1 was further  
400 confirmed according to the genome sequencing. The complete genome was  
401 composed of a circular chromosome of 4,040,837 bp with 43.86% GC content (Fig.  
402 6D, Table S5). The total numbers of genes were 4,193, which covered 88.6% of the  
403 genome encoding 3,176 proteins. The function of these annotated genes was mainly  
404 energy production and conversion, amino acid transport and metabolism,  
405 transcription, carbohydrate transport and metabolism, inorganic ion transport and  
406 metabolism, and signal transduction mechanisms based on the COG function  
407 classification (Fig. S5).

408

### 409 **Inoculation of biocontrol bacteria reduced ginseng death rate in a replanting** 410 **soil**

411 The pot experiment analysis revealed that ginseng death rate and the relative  
412 abundance of *Fusarium* significantly decreased by 63.3% and 46.1% in the  
413 replanting soils inoculated with strain 50-1, respectively (Fig. 7). Furthermore, the  
414 height and leaf area increased by 62.7% and 22.5%, respectively, after inoculation  
415 with strain 50-1 (Fig. S6). These results revealed that inoculation of biocontrol  
416 bacteria alleviated the ginseng replanting problem.

417

418 **Discussion**

419

420 Replanting problem is a common and serious issue in cultivation of medicinal plants.  
421 Following replantation, *Rehmannia glutinosa* suffers from disease, and its biomass  
422 and tuber quality decline (Qi *et al.*, 2009; Wu *et al.*, 2011; Yang *et al.*, 2011). The  
423 survival rate of ginseng seedlings is lower than 25% after replantation for three years  
424 (Zhao *et al.*, 2001). Multiple factors have caused this replanting problem, and  
425 researchers suggested that changes in microbial communities influence soil health  
426 and crop yield (Bisseling *et al.*, 2009; Bulgarelli *et al.*, 2013). In addition,  
427 rhizospheric microbial community is governed by plant species and growth (Incroglu  
428 *et al.*, 2011). Thus, we hypothesized that changes in the rhizospheric microbial  
429 community were driven by ginseng seedlings of different ages and development  
430 stages, which caused the replanting problem of *Panax* plants. Reducing the  
431 occurrence of the disease is a useful strategy to alleviate the replanting issues.  
432 Biological control is one of the most remarkable potential approaches for plant  
433 disease control because of its safety and environmental friendliness.

434 Diversity in bacterial and fungal communities changed in the rhizosphere of  
435 ginseng seedlings of different ages and developmental stages.  $H'$  and Chao1 values  
436 revealed that bacterial diversity was obviously low, whereas fungal diversity was  
437 significantly higher in the rhizosphere of adult ginseng seedlings in the root growth  
438 stage. A similar study reported that increase in ginseng cultivation ages reduced  
439 bacterial diversity and increased fungal diversity (Xiao *et al.*, 2016). Moreover,  
440 diversity of microbial community in the rhizosphere of *Pseudostellaria heterophylla*  
441 decreases with increased number of cropping years (Zhao *et al.*, 2016). Additionally,  
442 the developmental stage of crops is an important driver of microbial community  
443 structure (Houlden *et al.*, 2008). Plant ages and developmental stages alter the  
444 microbial diversity during growth. The diversity of soil microorganisms is critical in  
445 the maintenance of soil health and quality, and it serves as a sensitive bioindicator  
446 (He *et al.*, 2008). The death rate of notoginseng and fungal diversity are significantly



447 negatively correlated, which suggest that fungal diversity is a potential bioindicator  
448 of soil health (Dong *et al.*, 2016). A relationship exists between microbial diversity  
449 and root disease suppression (Nitta, 1991; Workneh & van Bruggen, 1994). Mazzola  
450 (2004) reported that reduced soil microbial diversity is responsible for the  
451 development of soil-borne diseases. Reduced bacterial diversity in response to adult  
452 plants is possibly the key indicator of ecological variations and functional  
453 impairment in a root growth stage.

454       The bacterial and fungal compositions evidently differed in the rhizospheres of  
455 ginseng plants of different ages and developmental stages. Variation in bacterial and  
456 fungal community composition is observed during continuous cropping of  
457 notoginseng (Dong *et al.*, 2016). Dynamics of microbial species is occurred in the  
458 rhizosphere during ginseng growth (Li *et al.*, 2012). Sugiyama *et al.* (2014) reported  
459 that soybeans affected the bacterial communities under vegetative stage, with further  
460 alterations possibly occurring during later growth stages. The most divergent  
461 community structures occur in the young plant stage of tomato, and the flowering  
462 and senescence stages show increasingly similar community structure (Inceoğlu *et al.*  
463 *et al.*, 2011). The composition of microbial community was affected by plant age and  
464 development stage. In our study, the agents of beneficial microbes were relatively  
465 few, whereas those of harmful microorganisms increased with plant age. The agents  
466 of beneficial microbes include the microorganisms that degrade compounds  
467 (*Luteolibacter*, Cytophagaceae, *Luteibacter*, and *Sphingomonas*), and resist disease  
468 and improve growth (Sphingomonadaceae and Zygomycota). The agents of harmful  
469 microorganisms mainly infect plants (*Brevundimonas*, Enterobacteriaceae,  
470 *Pandoraea*, Cantharellales, *Dendryphion*, and Chytridiomycota). Another study has  
471 showed similar results, i.e., the population of beneficial microbe decreases, whereas  
472 that of harmful microorganisms increases with increasing number of cropping years  
473 (Zhao *et al.*, 2016). Soil microbial community is an important bioindicator of soil  
474 function (Zuppinger-Dingley *et al.*, 2014). Changes in functional groups revealed  
475 that micro-ecological environment was degraded in the rhizosphere with increasing  
476 age of ginseng.



477 Rhizospheric microbial community can be influenced by soil characteristics and  
478 plant species (Lauber *et al.*, 2008; Berg and Smalla, 2009). In our study, the pH and  
479 available K and organic matter contents exhibited no significant difference in  
480 ginseng plants of different ages and developmental stages (Table S2). Plant species  
481 could be one of the most important factors that influence rhizobacterial communities  
482 (Micallef *et al.*, 2009). Root exudates offer substrates for microbial metabolism and  
483 act as intermediates for biogeochemical reactions in rhizosphere (Uren, 2000; Berg  
484 and Smalla, 2009). In the early developmental stages of *Arabidopsis*, cumulative  
485 secretion levels of sugars and sugar alcohols are high, which enhanced the richness  
486 of rhizospheric microbial community (Chaparro *et al.*, 2014). By contrast, root  
487 exudates contain allelochemical that disturbs the balance in a microbial community  
488 (Wu *et al.*, 2015). These results imply that root exudates are one of the main drivers  
489 of changes in rhizospheric microbial communities during ginseng growth. Moreover,  
490 our results showed that the diversity of microbial communities markedly changed in  
491 the rhizosphere of ginseng plants with different ages in root growth stage. This  
492 phenomenon is possibly a result of different root types and root exudates. The  
493 composition of *Arabidopsis* root exudates changes throughout developmental  
494 gradient in plants, and tomato root exudates in reproductive stage are more  
495 phytotoxic than those in vegetative stage (Yu and Matsui, 1994; Chaparro *et al.*,  
496 2013). Ginseng root rapidly grows after cropping for three years before harvest,  
497 especially in root growth stage. Ginseng root growth stage is possibly characterized  
498 by a specific but different root exudation pattern that drives different bacterial  
499 communities.

500 Biological control using microbes is an environmentally friendly approach of  
501 controlling disease (Bargabus *et al.*, 2003; Tjamos *et al.*, 2005). In our study, we  
502 isolated *B. subtilis* 50-1 as an effective antagonist against *F. oxysporum*; the results  
503 of antagonist inoculation revealed that biocontrol bacterium reduced the ginseng  
504 morbidity and alleviated the replanting problem. *Bucillus* strains, as potent biological  
505 control agents of plant diseases, have been reported in many studies (Zouari *et al.*,  
506 2016; Shahzad *et al.*, 2017). The biocontrol efficacy of *B. amyloliquefaciens* 54

507 against bacterial fruit blotch is evident in a greenhouse (Jiang *et al.*, 2015). *B.*  
508 *megaterium* (B5), *B. cereus* sensu lato (B25), and *Bacillus* sp. (B35) display the  
509 highest antagonistic activity against *Fusarium verticillioides*, and antagonistic  
510 activity reveals that these strains produce glucanases, proteases, chitinases,  
511 siderophores, and auxins (Figuroa-López *et al.*, 2016). Furthermore, data suggest  
512 that microbial strains producing bioactive constituents can help the inoculated plant  
513 to reduce the negative effects of pathogenesis and abiotic stresses (Shahzad *et al.*,  
514 2017). The microbial antagonists could be used for efficient control of plant  
515 pathogens and comprise an environmentally friendly approach. Additionally, genome  
516 sequence analysis provides insights into the pathways of functional bacteria and  
517 facilitates their exploration. The genome sequence analysis of *Ganoderma lucidum*  
518 revealed key genes encoding cytochrome P450s in secondary metabolism (Chen *et*  
519 *al.*, 2012). In our study, the genome sequence of strain 50-1 helps accelerate the  
520 development and application of biological inoculant.

521

## 522 **Supplementary data**

523 The details were online.

524 **Table S1** Description of developmental stages of ginseng and the sampling times.

525 **Table S2** Soil chemical characteristics in soils of ginseng cropping.

526 **Table S3** Barcodes, numbers of bacterial and fungal sequences and average length in  
527 each sample.

528 **Table S4** Physiological and biological characteristics of *Bacillus subtilis* 50-1.

529 **Table S5** Genome features of *Bacillus subtilis* strain 50-1.

530 **Figure S1** Changes in bacterial and fungal community in rhizosphere of ginseng  
531 seedlings of different ages and developmental stages.

532 **Figure S2** LEfSe identified the taxa in the soil bacterial communities of plants of  
533 different ages in vegetative (A), flowering (B), fruiting (C), and root growth stages  
534 (D).

535 **Figure S3** LEfSe identified the taxa in the fungal communities of plants of different  
536 ages in vegetative (A), flowering (B), fruiting (C), and root growth stages (D).

537 **Figure S4** Relative abundance of *Fusarium* in the soils based on the analysis of  
538 real-time PCR.

539 **Figure S5** COG function classification in the *Bacillus subtilis* strain 50-1.

540 **Figure S6** The height (A) and leaf area (B) of ginseng seedlings after inoculation of  
541 strain 50-1 in a replanting soil.

542

#### 543 **Acknowledgements**

544 This study was supported by grants from the National Science Foundation of China  
545 (81603238 and 81403053).

546

## References

- Abd-El Salam KA, Aly IN, Abdel-Satar MA, Khalil MS, Verreet JA.** 2003. PCR identification of *Fusarium* genus based on nuclear ribosomal-DNA sequence data. *African Journal of Biotechnology* **2**, 82–85.
- Bargabus RL, Zidack NK, Sherwood JE, Jacobsen BJ.** 2003. Oxidative burst elicited by *Bacillus mycoides* isolate Bac J: a biological control agent, occurs independently of hypersensitive cell death in sugar beet. *Molecular Plant-Microbe Interactions* **16**, 1145–1153.
- Besemer J, Lomsadze A, Borodovsky M.** 2001. GeneMarkS: a self-training method for prediction of gene starts in microbial genomes. Implications for finding sequence motifs in regulatory regions. *Nucleic Acids Research* **29**, 2607–2618.
- Berg G, Smalla K.** 2009. Plant species and soil type cooperatively shape the structure and function of microbial communities in the rhizosphere. *FEMS Microbiology Ecology* **68**, 1–13.
- Bisseling T, Dangl JL, Schulze-Lefert P.** 2009. Next-generation communication. *Science* **324**, 691.
- Bulgarelli D, Schlaeppi K, Spaepen S, Ver Loren van Themaat E, Schulze-Lefert P.** 2013. Structure and functions of the bacterial microbiota of plants. *Annual Review of Plant Biology* **64**, 807–838.
- Cai Z, Chen Q, Wang H, He Y, Wang W, Zhao X, Ye Q.** 2012. Degradation of the novel herbicide ZI0273 by *Amycolatopsis* sp. M3-1 isolated from soil. *Applied Microbiology and Biotechnology* **96**, 1371–1379.
- Caporaso JG, Bittinger K, Bushman FD, DeSantis TZ, Andersen GL, Knight R.** 2010. PyNAST: a flexible tool for aligning sequences to a template alignment. *Bioinformatics* **26**: 266–267.
- Chaparro JM, Badri DV, Bakker MG, Sugiyama A, Manter DK, Vivanco JM.** 2013. Root exudation of phytochemicals in *Arabidopsis* follows specific patterns that are developmentally programmed and correlate with soil microbial functions. *PLoS One* **8**, e55731.
- Chaparro JM, Badri DV, Vivanco JM.** 2014. Rhizosphere microbiome assemblage

is affected by plant development. *The ISME Journal* **8**, 790–803.

**Chen S, Song J, Sun C, et al.** 2015. Herbal genomics: Examining the biology of traditional medicines. *Science* **347(6219)**, S27–S29.

**Chen S, Xu J, Liu C, et al.** 2012. Genome sequence of the model medicinal mushroom *Ganoderma lucidum*. *Nature Communications* **3**, 913.

**Choo MK, Sakurai H, Kim DH, Saiki I.** 2008. A ginseng saponin metabolite suppresses tumor necrosis factor-alpha-promoted metastasis by suppressing nuclear factor-kappa B signaling in murine colon cancer cells. *Oncology Reports* **19**, 595–600.

**Dong L, Xu J, Feng G, Li X, Chen S.** 2016. Soil bacterial and fungal community dynamics in relation to *Panax notoginseng* death rate in a continuous cropping system. *Scientific Reports* **6**, 31802.

**Ernst E.** 2010. *Panax ginseng*: an overview of the clinical evidence. *Journal of Ginseng Research* **34**, 259–263.

**Fierer N, Hamady M, Lauber CL, Knight R.** 2008. The influence of sex, handedness, and washing on the diversity of hand surface bacteria. *Proceedings of the National Academy of Sciences of the United States of America* **105**, 17994–17999.

**Figuroa-López AM, Cordero-Ramírez JD, Martínez-Alvarez JC, López-Meyer M, Lizárraga-Sánchez GJ, Félix-Gastélum R, Castro-Martínez C, Maldonado-Mendoza IE.** 2016. Rhizospheric bacteria of maize with potential for biocontrol of *Fusarium verticillioides*. *SpringerPlus* **5**, 1–12.

**Guo R, Liu X, Li S, Miao Z.** 2009. In vitro inhibition of fungal root-rot pathogens of *Panax notoginseng* by rhizobacteria. *The Plant Pathology Journal* **25**, 70–76.

**He JZ, Zheng Y, Chen CR, He YQ, Zhang LM.** 2008. Microbial composition and diversity of an upland red soil under long-term fertilization treatments as revealed by culture-dependent and culture-independent approaches. *Journal of Soil and Sediments* **8**, 349–358.

**Heuberger H, Bauer R, Friedl F, Heubl G, Hummelsberger J, Nögel R, Seidenberger R, Torres-Londoño P, Planta M.** 2010. Cultivation and

- breeding of Chinese medicinal plants in Germany. *Planta Medica* **76**, 1956–1962.
- Hong SG, Lee KH, Kwak J, Bae KS.** 2006. Diversity of yeasts associated with *Panax ginseng*. *Journal of Microbiology* **44**, 674–679.
- Huang LF, Song LX, Xia XJ, Mao WH, Shi K, Zhou YH, Yu JQ.** 2013. Plant-soil feedbacks and soil sickness: From mechanisms to application in agriculture. *Journal of Chemical Ecology* **39**, 232–242.
- Houlden A, Timms-Wilson TM, Day MJ, Bailey MJ.** 2008. Influence of plant developmental stage on microbial community structure and activity in the rhizosphere of three field crops. *FEMS Microbiology Ecology* **65**, 193–201.
- Inceoğlu Ö, Al-Soud WA, Salles JF, Semenov AV, van Elsas JD.** 2011. Comparative analysis of bacterial communities in a potato field as determined by pyrosequencing. *PLoS One* **6**, e23321.
- Jiang CH, Wu F, Yu ZY, Xie P, Ke HJ, Li HW, Yu YY, Guo JH.** 2015. Study on screening and antagonistic mechanisms of *Bacillus amyloliquefaciens* 54 against bacterial fruit blotch (BFB) caused by *Acidovorax avenae* subsp. *citrulli*. *Microbiological Research* **170**, 95.
- Kamilova F, Kravchenko LV, Shaposhnikov, AI, Makarova N, Lugtenberg B.** 2006. Effects of the tomato pathogen *Fusarium oxysporum* f. sp. *radicis-lycopersici* and of the biocontrol bacterium *Pseudomonas fluorescens* WCS365 on the composition of organic acids and sugars in tomato root exudate. *Molecular Plant-Microbe Interactions* **19**, 1121–1126.
- Kaiser C, van der Merwe R, Bekker TF, Labuschagne N.** 2005. *In-vitro* inhibition of mycelial growth of several phytopathogenic fungi, including *Phytophthora cinnamomi* by soluble silicon. *South African Avocado Growers' Association Yearbook* **28**, 70–74.
- Koren S, Schatz MC, Walenz BP, et al.** 2012. Hybrid error correction and *de novo* assembly of single-molecule sequencing reads. *Nature Biotechnology* **30**, 693–700.
- Krzywinski M, Schein J, Birol I, Connors J, Gascoyne R, Horsman D, Jones SJ,**

- Marra MA.** 2009. Circos: an information aesthetic for comparative genomics. *Genome Research* **19**, 1639–1645.
- Lauber CL, Strickland MS, Bradford MA, Fierer N.** 2008. The influence of soil properties on the structure of bacterial and fungal communities across land-use types. *Soil Biology Biochemistry* **40**, 2407–2415.
- Li R, Li Y, Kristiansen K, Wang J.** 2008. SOAP: short oligonucleotide alignment program. *Bioinformatics* **24**, 713–714.
- Li R, Zhu H, Ruan J, et al.** 2010. De novo assembly of human genomes with massively parallel short read sequencing. *Genome Research* **20**, 265–272.
- Li Y, Ying Y, Zhao D, Ding W.** 2012. Microbial community diversity analysis of *Panax ginseng* rhizosphere and non-rhizosphere soil using randomly amplified polymorphic DNA method. *Open Journal of Genetics* **2**, 95–102.
- Manici LM, Kelderer M, Franke-Whittle IH, Rühmer T, Baab G, Nicoletti F, Caputo F, Topp A, Insam H, Naef A.** 2013. Relationship between root-endophytic microbial communities and replant disease in specialized apple growing areas in Europe. *Applied Soil Ecology* **72**, 207–214.
- Mazzola M.** 2004. Assessment and management of soil community structure for disease suppression. *Annual Review of Phytopathology* **42**, 35–59.
- Miao Z, Li S, Liu X, Chen Y, Li Y, Wang Y, Guo R, Xia Z, Zhang K.** 2006. The causal microorganisms of *Panax notoginseng* root rot disease. *Scientia Agricultura Sinica* **39**, 1371–1378.
- Micallef SA, Shiaris MP, Colón-Carmona A.** 2009. Influence of *Arabidopsis thaliana* accessions on rhizobacterial communities and natural variation in root exudates. *Journal of Experimental Botany* **60**, 1729–1742.
- Nayyar A, Hamel C, Lafond G, Gossen B, Hanson K, Germida J.** 2009. Soil microbial quality associated with yield reduction in continuous-pea. *Applied Soil Ecology* **43**, 115–121.
- Nitta T.** 1991. Diversity of root fungal floras: Its implications for soil-borne diseases and crop growth. *Jarq-japan Agricultural Research Quarterly* **25**, 6–11.
- Ogwen JO, Yu JQ.** 2006. Autotoxic potential in soil sickness: a Re-examination.

Allelopathy Journal **18**, 93–101.

**Qi J, Yao H, Ma X, Zhou L, Li X.** 2009. Soil microbial community composition and diversity in the rhizosphere of a Chinese medicinal plant. *Communications in Soil Science and Plant Analysis* **40**, 1462–1482.

**Quast C, Pruesse E, Yilmaz P, Gerken J, Schweer T, Yarza P, Peplies J, Glöckner FO.** 2013. The SILVA ribosomal RNA gene database project: improved data processing and Web-based tools. *Nucleic Acids Research* **41**, D590–D596.

**Rodrigues JLM, Pellizari VH, Mueller R, et al.** 2013. Conversion of the Amazon rainforest to agriculture results in biotic homogenization of soil bacterial communities. *Proceedings of the National Academy of Sciences of the United States of America* **110**, 988–993.

**Rousk J, Bååth E, Brookes PC, Lauber CL, Lozupone C, Caporaso JG, Knight R, Fierer N.** 2010. Soil bacterial and fungal communities across a pH gradient in an arable soil. *The ISME Journal* **4**, 1–12.

**Schloss EP, Flanagan DM, Culler CL, Wright AL.** 2009. Some hidden costs of faculty turnover in clinical departments in one academic medical center. *Academic Medicine* **84**, 32–36.

**Segata N, Abubucker S, Goll J, et al.** 2011. Microbial community function and biomarker discovery in the human microbiome. *Genome Biology* **12**, P47.

**Shahzad R, Khan AL, Bilal S, Asaf S, Lee IJ.** 2017. Plant growth-promoting endophytic bacteria versus pathogenic infections: an example of *Bacillus amyloliquefaciens* RWL-1 and *Fusarium oxysporum* f. sp. lycopersici in tomato. *Peer Journal* **5**, e3107.

**Sugiyama A, Ueda Y, Zushi T, Takase H, Yazaki K.** 2014. Changes in the bacterial community of soybean rhizospheres during growth in the field. *PLoS One* **9**, e100709.

**Tjamos SE, Flemetakis E, Paplomatas EJ, Katinakis P.** 2005. Induction of resistance to *Verticillium dahliae* in *Arabidopsis thaliana* by the biocontrol agent K-165 and pathogenesis-related proteins gene expression. *Molecular*



Plant-Microbe Interactions **18**, 555–561.

**Uren NC.** 2000. Types, amounts and possible functions of compounds released into the rhizosphere by soil grown plants. In: Pinton R, Varani Z, Nanniperi P, eds. *The rhizosphere: biochemistry, and organic substances at the soil interface*. New York, NY, USA: Marcel Dekker Inc., 19–40.

**Wang R, Dong L, Xu J, Zhang N, Naoki F, Li X, Shen L, Chen S.** 2016. Identification and prevention of root rot pathogen in model of ginseng cultivated in farmlands. *China Journal of Chinese Materia Medica* **41**, 1787–1791.

**Wang Q, Garrity GM, Tiedje JM, Cole J.** 2007. Naïve Bayesian classifier for rapid assignment of rRNA sequences into the new bacterial taxonomy. *Applied and Environmental Microbiology* **73**, 5261–5267.

**Workneh F, van Bruggen AHC.** 1994. Microbial diversity, composition, and diversity in organically and conventionally managed rhizosphere soil in relation to suppression of corky root of tomatoes. *Applied soil Ecology* **1**, 219–230.

**Wu L, Wang J, Huang W, Wu H, Chen J, Yang Y, Zhang Z, Lin W.** 2015. Plant-microbe rhizosphere interactions mediated by *Rehmannia glutinosa* root exudates under consecutive monoculture. *Scientific Reports* **5**, 15871.

**Wu H, Yang H, You X, Li Y.** 2013. Diversity of endophytic fungi from roots of *Panax ginseng* and their saponin yield capacities. *SpringerPlus* **2**, 107.

**Wu LJ, Zhao YH, Guan YM, Pang SF.** 2008. A review on studies of the reason and control methods of succession cropping obstacle of *Panax ginseng* C.A. Mey. *Special Wild Economic Animal and Plant Research* **2**, 68–72.

**Wu L, Wang H, Zhang Z, Lin R, Zhang Z, Lin W.** 2011. Comparative metaproteomic analysis on consecutively *Rehmannia glutinosa*-monocultured rhizosphere soil. *PLoS One* **6**, e20611.

**Xiao C, Yang L, Zhang L, Liu C, Han M.** 2016. Effects of cultivation ages and modes on microbial diversity in the rhizosphere soil of *Panax ginseng*. *Journal of Ginseng Research* **40**, 28–37.

**Yang Y, Chen X, Chen J, Xu H, Li J, Zhang Z.** 2011. Differential miRNA

- expression in *Rehmannia glutinosa* plants subjected to continuous cropping. *BMC Plant Biology* **11**, 53.
- Ying YX, Ding WL, Li Y.** 2012. Characterization of soil bacterial communities in rhizospheric and nonrhizospheric soil of *Panax ginseng*. *Biochemical Genetics* **50**, 848–859.
- Ying Y, Ding W, Zhou Y, Li Y.** 2012. Influence of *Panax ginseng* continuous cropping on metabolic function of soil microbial communities. *Chinese Herbal Medicine* **4**, 329–334.
- Yu JQ, Matsui Y.** 1994. Phytotoxic substances in root exudates of cucumber (*Cucumis sativus* L.). *Journal of Chemical Ecology* **20**, 21–31.
- Zhang B, Peng Y, Zhang Z, Liu H, Qi Y, Liu S, Xiao P.** 2010. GAP production of TCM herbs in China. *Planta Medica* **76**, 1948–1955.
- Zhao RF.** 2001. The mechanism of re-plantation problem in ginseng and American ginseng. *Special Wild Economic Animal and Plant Research* **1**, 40–45.
- Zhao YP, Lin S, Chu L, Gao J, Azeem S, Lin W.** 2016. Insight into structure dynamics of soil microbiota mediated by the richness of replanted *Pseudostellaria heterophylla*. *Scientific Reports* **6**, 26175.
- Zheng Y, Xue QY, Xu LL, Xu Q, Lu S, Gu C, Guo JH.** 2011. A screening strategy of fungal biocontrol agents towards *Verticillium* wilt of cotton. *Biocontrol Control* **56**, 209–216.
- Zouari I, Jlaiel L, Tounsi S, Trigui M.** 2016. Biocontrol activity of the endophytic of the endophytic *Bacillus amyloliquefaciens* strain CEIZ-11 against *Pythium aphanidermatum* and purification of its bioactive compounds. *Biological Control* **100**, 54–62.
- Zuppinger-Dingley D, Schmid B, Petermann JS, Yadav V, De Deyn GB, Flynn DF.** 2014. Selection for niche differentiation in plant communities increases biodiversity effects. *Nature* **515**, 108–111.

548 **Figure captions**

549

550 **Figure 1** Growth status of ginseng seedlings. (A–C) Two-, three-, and four-year-old  
551 ginseng seedlings, respectively. (D) Emergence rate of ginseng seedlings. (E)  
552 Survival rate of ginseng seedlings. 2-y, 3-y, and 4-y represents the transplanted two-,  
553 three-, and four-year-old seedlings, respectively. Data are presented as mean  $\pm$  SD ( $n$   
554 = 3). Identical letters denote nonsignificant difference at 0.05 significance level.

555

556 **Figure 2** Bacterial and fungal diversities in the rhizosphere of ginseng seedlings of  
557 different ages and developmental stages. (A, B) show the Chao 1 and Shannon  
558 diversity ( $H'$ ) of bacterial community. (C, D) show the Chao 1 and  $H'$  of fungal  
559 community. Ve, Fl, Fr, and Ro represent vegetative, flowering, fruiting, and root  
560 growth stages, respectively. Data are presented as mean  $\pm$  SD ( $n = 3$ ). Non-identical  
561 letters denote significant difference in the same developmental stage of ginseng plant  
562 with different ages at 0.05 significance level.

563

564 **Figure 3** Changes in bacterial and fungal communities in the rhizosphere of ginseng  
565 seedlings of different ages and developmental stages. (A–D) PCoA ordination plots  
566 display the relatedness of samples separated using Unweighted UniFrac distance of  
567 classified 16S rRNA gene sequences at vegetative, flowering, fruiting, and root  
568 growth stages, respectively. (E–H) PCoA ordination plots show the relatedness of  
569 samples separated using Unweighted UniFrac distance of classified 18S rRNA gene  
570 sequences at the Ve, Fl, Fr, and Ro stages, respectively. Red, green, and blue  
571 represent the samples in the rhizosphere of 2-y, 3-y, and 4-y transplanted ginseng  
572 seedlings, respectively.

573

574 **Figure 4** Relative abundance of the bacterial taxa detected by the linear discriminant  
575 analysis effect size (LEfSe) as biomarker. (A–D) represent the vegetative, flowering,  
576 fruiting, and root growth stages, respectively. 2-, 3- and 4- represent the samples in  
577 the rhizosphere of 2-y, 3-y, and 4-y transplanted ginseng seedlings. Data represent

578 the mean values of  $n = 3$ .

579

580 **Figure 5** Relative abundance of the fungal taxa detected by LEfSe as biomarker and  
581 *Fusarium*. (A–D) represent the vegetative, flowering, fruiting, and root growth  
582 stages, respectively. (E) Relative abundance of *Fusarium*. Data are presented as  
583 mean  $\pm$  SD ( $n = 3$ ).

584

585 **Figure 6** *Bacillus subtilis* 50-1 antagonized *Fusarium oxysporum*. (A) Colony  
586 diameter measured in a dual culture. (B) Morphological features of bacterium 50-1.  
587 (C) Relationships of 16S rRNA sequences between *B. subtilis* strain 50-1 (black  
588 body) and published 16S rDNA sequences. (D) Genome map of strain 50-1. The six  
589 circles (outer to inner) represent the scale line, forward strand CDSs (color by COG  
590 categories), reverse strand CDSs (color by COG categories), RNA genes, GC content,  
591 and GC skew. From outside to center: genome size, genes on the forward strand  
592 (color by COG categories), genes on the reverse strand (color by COG categories),  
593 RNA genes (tRNAs, orange; rRNAs, red), GC content (red and blue), and GC skew.  
594 Only bootstrap values higher than 70% are shown. Bars represent the mean  $\pm$  SE ( $n$   
595 = 3). Asterisks denote significant differences between the colony diameters of *F.*  
596 *oxysporum* and *F. oxysporum* + strain 50-1 at  $P < 0.05$ .

597

598 **Figure 7** Inoculation of strain 50-1 in ginseng replanting soils. (A) Death rate of  
599 ginseng after inoculation with strain 50-1. (B) Copy numbers of *Fusarium* in soils.  
600 No-inoculation and inoculation represent the samples inoculated with cultures  
601 containing inactivated and activated strain 50-1, respectively. Data are presented as  
602 mean  $\pm$  SD ( $n = 3$ ). Asterisks denote significant differences between the  
603 No-inoculation and inoculation at  $P < 0.05$ .

604

605

606 **Figure 1**

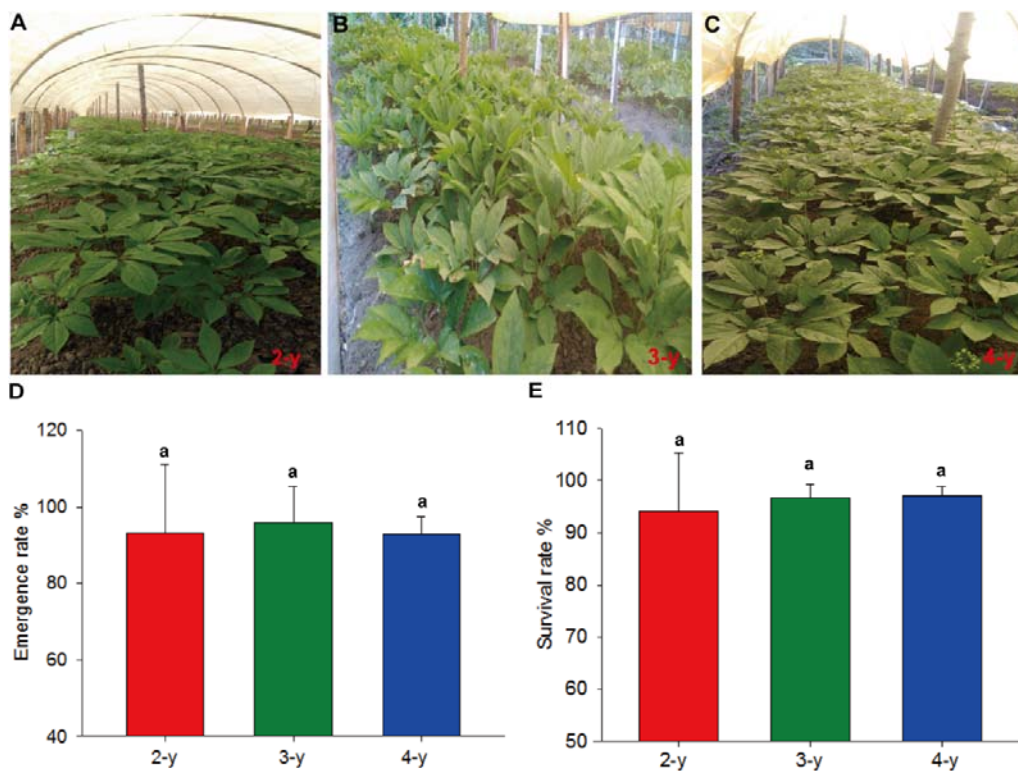

607

608

609 **Figure 2**

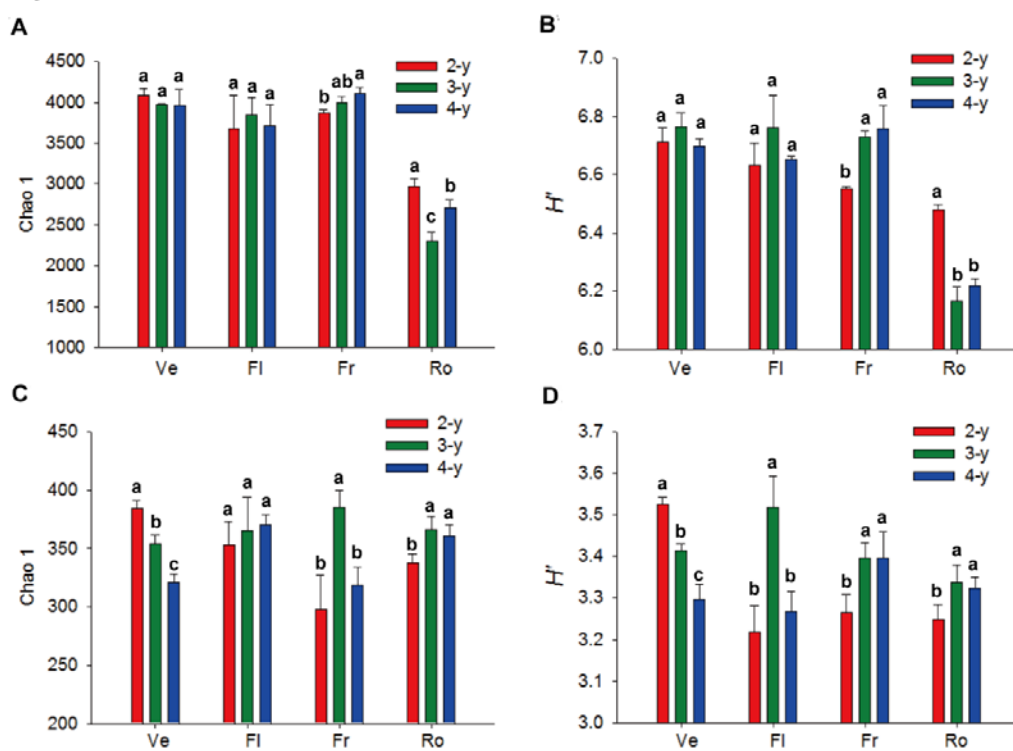

610  
611

612 **Figure 3**

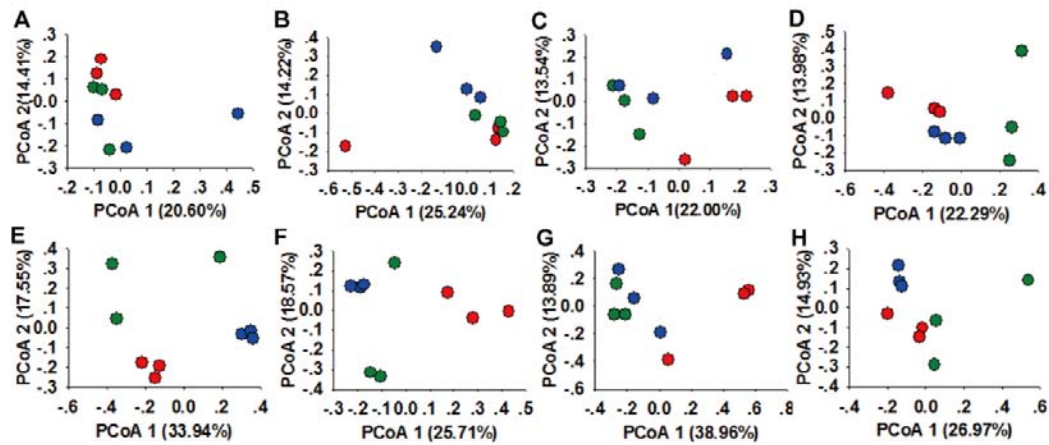

613

614

615 **Figure 4**

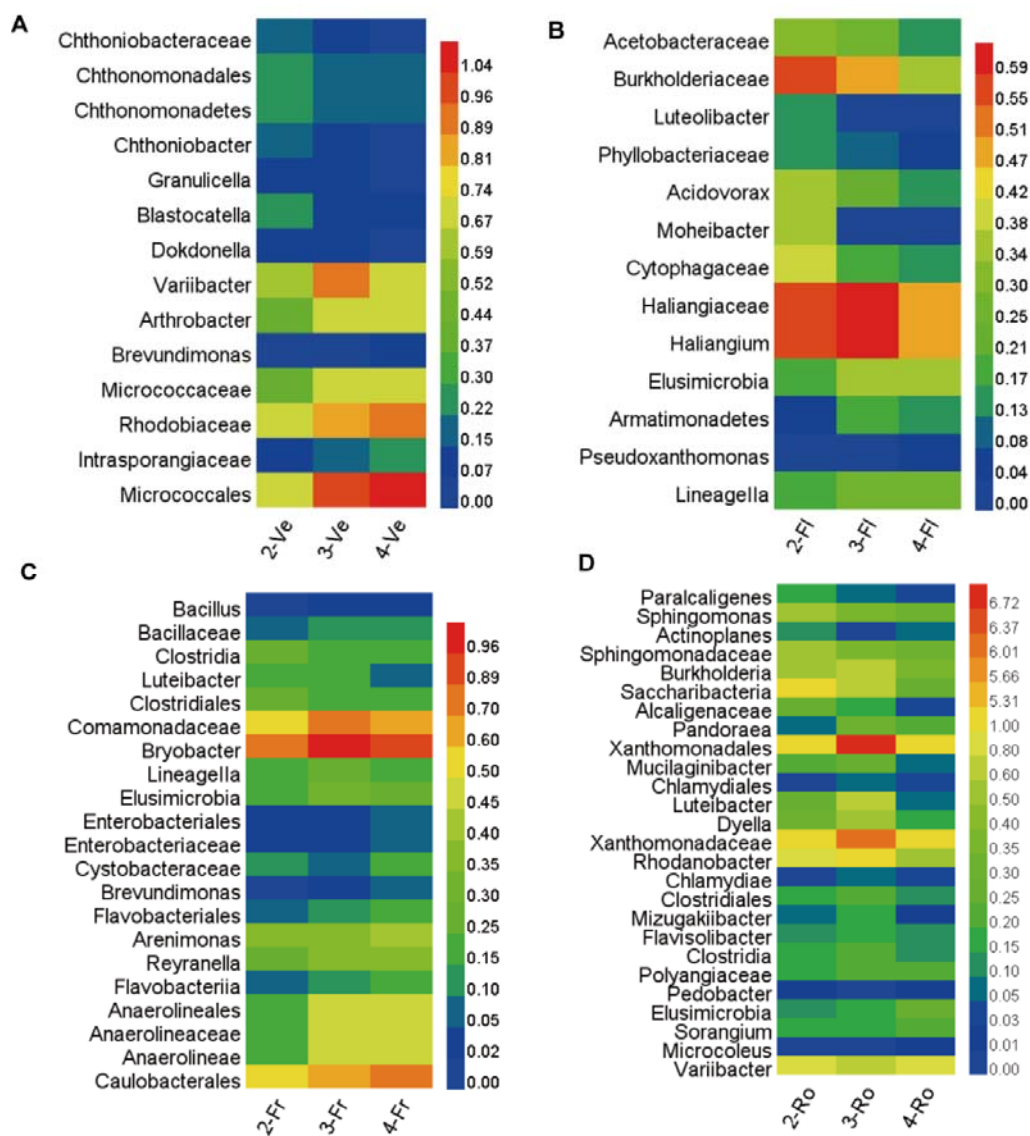

616

617



618 **Figure 5**

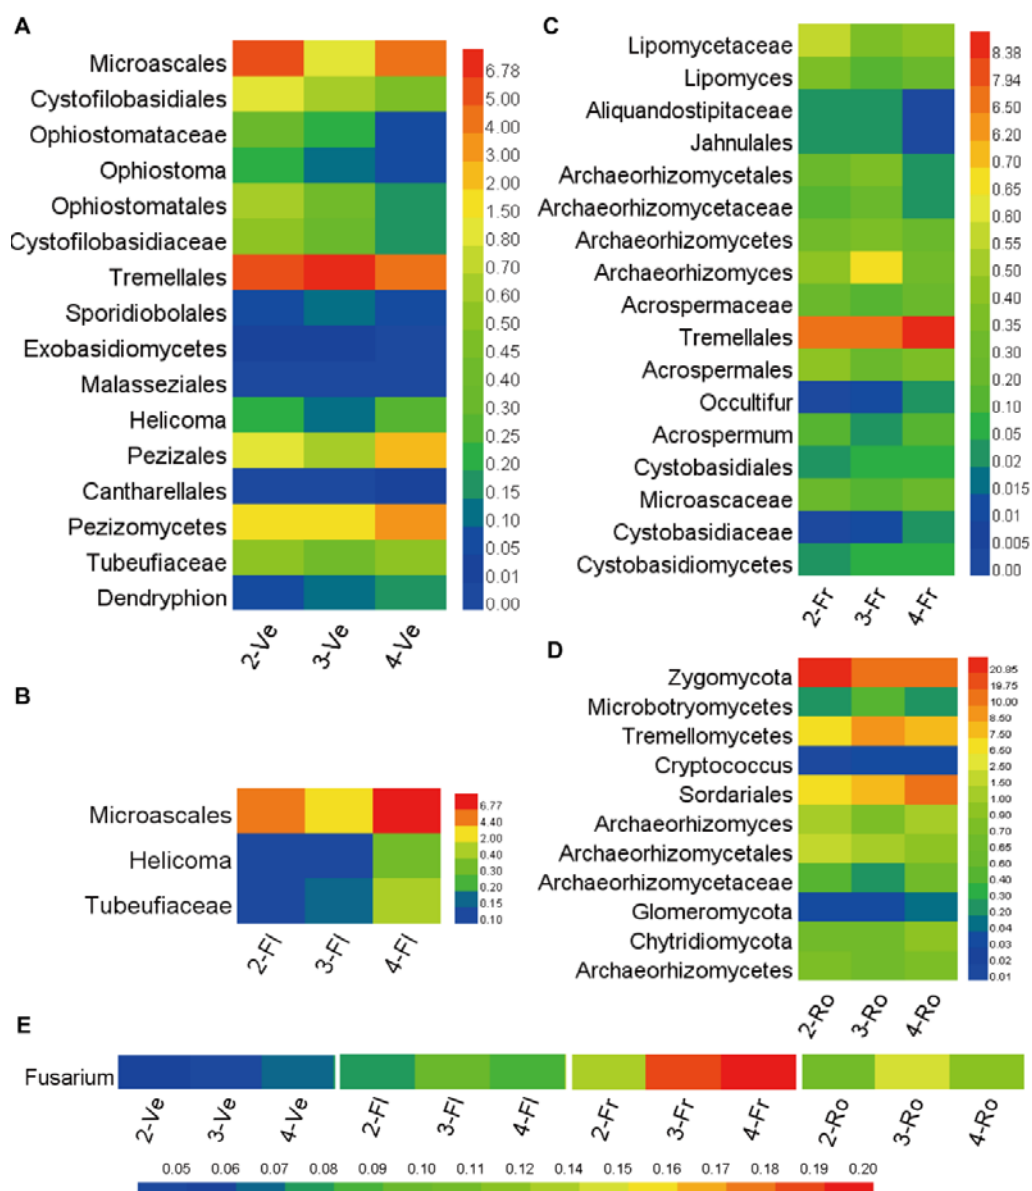

619

620

621 **Figure 6**

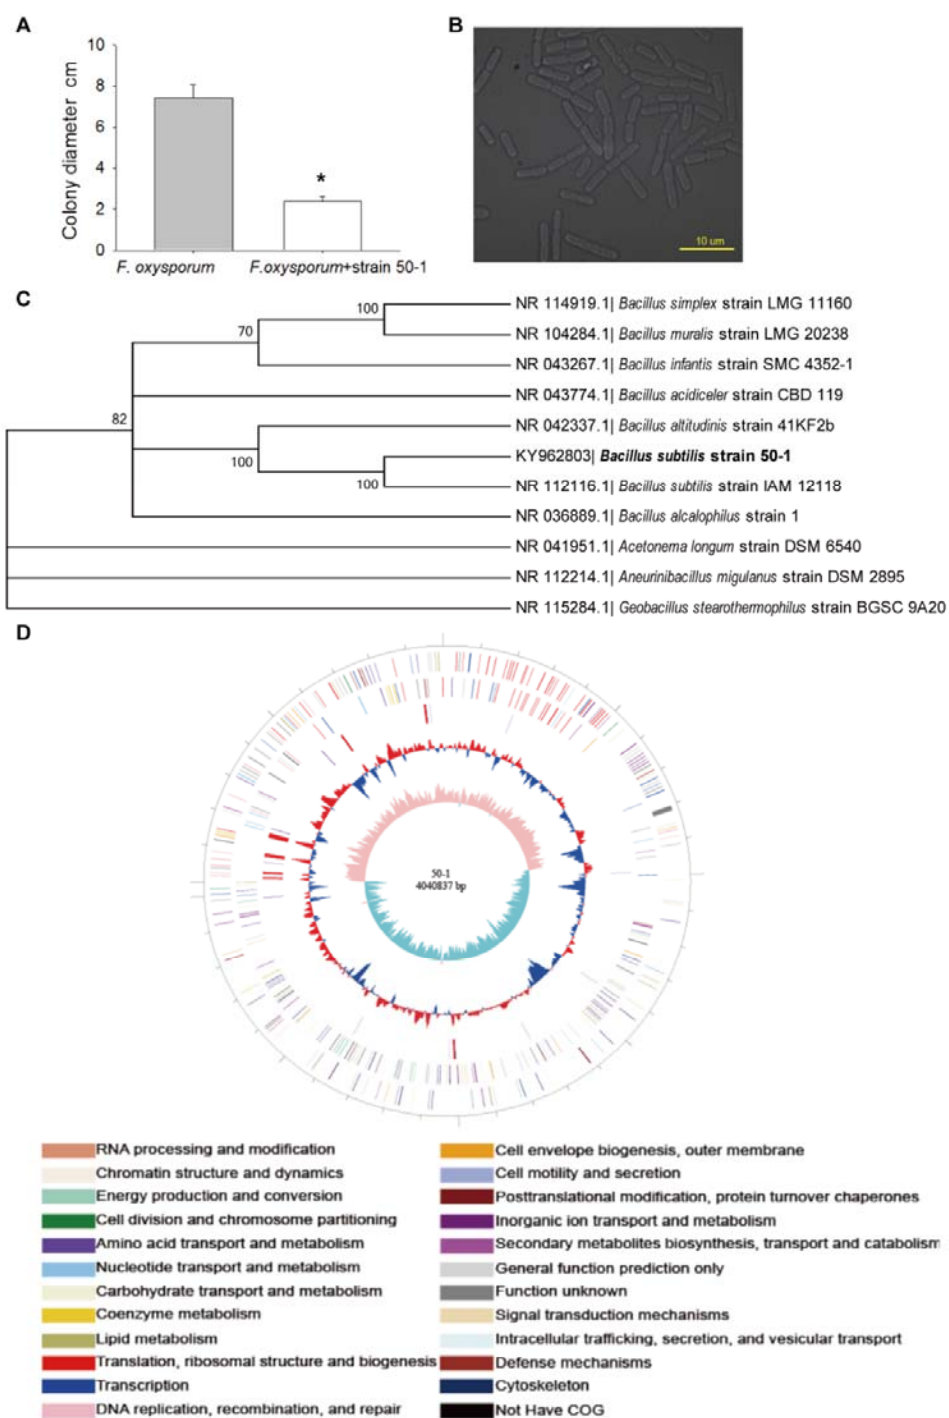

622

623

624 **Figure 7**

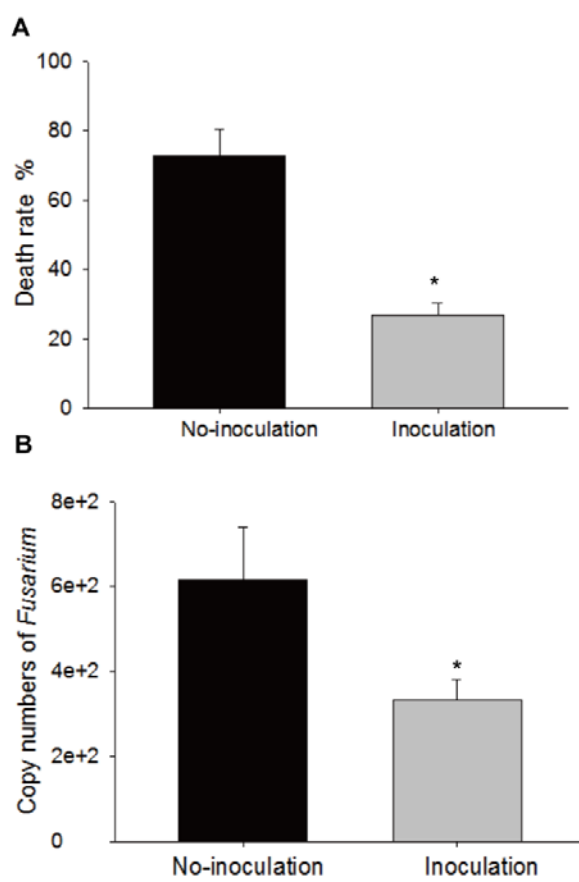

625

626
